# Supplementary material
Source: ML conference proceedings conference paper supplement (https://proceedings.neurips.cc/paper_files/paper/2017/hash/7e7757b1e12abcb736ab9a754ffb617a-Abstract.html)
Supplement: Supplementary file [file 7e7757b1e12abcb736ab9a754ffb617a-Supplemental.zip]

---

# Supplementary Material to "Group Sparse Additive Machine"

---

## 1 Technical proof of Theorem 1

For feasibility, we recall the error decomposition in Section 3 as below.

**Proposition 1** *For  $f_{\mathbf{z}}$  defined in Section 2, there holds*

$$\begin{aligned}\mathcal{R}(\text{sgn}(f_{\mathbf{z}})) - \mathcal{R}(f_c) &\leq \mathcal{E}(\pi(f_{\mathbf{z}})) - \mathcal{E}(f_c) \\ &\leq E_1 + E_2 + E_3 + D(\eta),\end{aligned}$$

where  $D(\eta)$  is defined in Section 3,

$$E_1 = \mathcal{E}(\pi(f_{\mathbf{z}})) - \mathcal{E}(f_c) - (\mathcal{E}_{\mathbf{z}}(\pi(f_{\mathbf{z}})) - \mathcal{E}_{\mathbf{z}}(f_c)), \quad (1)$$

$$E_2 = \mathcal{E}_{\mathbf{z}}(f_{\eta}) - \mathcal{E}_{\mathbf{z}}(f_c) - (\mathcal{E}_{\mathbf{z}}(f_{\eta}) - \mathcal{E}(f_c)), \quad (2)$$

and

$$E_3 = \mathcal{E}_{\mathbf{z}}(\pi(f_{\mathbf{z}})) + \lambda\Omega(f_{\mathbf{z}}) - (\mathcal{E}_{\mathbf{z}}(f_{\eta}) + \eta \sum_{j=1}^d \tau_j \|f_{\eta}^{(j)}\|_{K^{(j)}}^2). \quad (3)$$

### 1.1 Hypothesis error estimate

To estimate the hypothesis error  $E_3$ , we choose  $\bar{f}_{\mathbf{z}}$  in Section 2 as the stepping stone function to bridge  $\mathcal{E}_{\mathbf{z}}(\pi(f_{\mathbf{z}})) + \lambda\Omega(f_{\mathbf{z}})$  and  $\mathcal{E}_{\mathbf{z}}(f_{\eta}) + \lambda \sum_{j=1}^d \tau_j \|f_{\eta}^{(j)}\|_{K^{(j)}}^2$ . The proof is inspired from the stepping stone technique for support vector machine classification [6, 2].

The optimization framework for  $\bar{f}_{\mathbf{z}}$  can be rewritten as the following quadratic programming optimization problem:

$$\begin{aligned}\min_{f^{(j)}} \quad & \frac{1}{n} \sum_{i=1}^n \xi_i + \eta \sum_{j=1}^d \tau_j \langle f^{(j)}, f^{(j)} \rangle_{K^{(j)}}, \\ \text{s.t.} \quad & y_i \sum_{j=1}^d \langle f^{(j)}, K^{(j)}(x_i^{(j)}, \cdot) \rangle_{K^{(j)}} \geq 1 - \xi_i, \\ & \xi_i \geq 0, i = 1, \dots, n.\end{aligned}$$

We define the Lagrangian function of the above optimization problem as

$$\begin{aligned}L(f, \mu, \gamma) = & \frac{1}{2n\eta} \sum_{i=1}^n \xi_i + \frac{1}{2} \sum_{j=1}^d \tau_j \langle f^{(j)}, f^{(j)} \rangle_{K^{(j)}} - \sum_{i=1}^n \gamma_i \xi_i \\ & - \sum_{i=1}^n \mu_i \left( y_i \sum_{j=1}^d \langle f^{(j)}, K^{(j)}(x_i^{(j)}, \cdot) \rangle_{K^{(j)}} - 1 + \xi_i \right),\end{aligned}$$

where  $\mu_i, \gamma_i, 1 \leq i \leq n$  are Lagrangian parameters.

The parameters minimizing  $L$  satisfy

$$\begin{aligned}\frac{\partial L}{\partial f^{(j)}} &= \tau_j f^{(j)} - \sum_{i=1}^n \mu_i y_i K^{(j)}(x_i^{(j)}, \cdot) = 0, \forall j \in \{1, \dots, d\}, \\ \frac{\partial L}{\partial \xi_i} &= \frac{1}{2n\eta} - \beta_i - \gamma_i = 0.\end{aligned}$$

Then, we obtain that

$$f^{(j)} = \sum_{i=1}^n \mu_i \tau_j^{-1} y_i K^{(j)}(x_i^{(j)}, \cdot), \quad \forall j \in \{1, \dots, d\},$$

and

$$\mu_i + \gamma_i = \frac{1}{2n\eta}, \quad \forall i \in \{1, \dots, n\}.$$

Hence,  $\bar{f}_{\mathbf{z}}$  defined in Section 2 satisfies that

$$\bar{f}_{\mathbf{z}} = \sum_{j=1}^d \bar{f}_{\mathbf{z}}^{(j)} = \sum_{j=1}^d \sum_{i=1}^n \mu_i \tau_j^{-1} y_i K^{(j)}(x_i^{(j)}, \cdot) \quad (4)$$

with

$$0 \leq \mu_i \leq \frac{1}{2n\eta}, \quad \forall i \in \{1, \dots, n\}. \quad (5)$$

**Proposition 2** *For the hypothesis error  $E_3$  defined in (3), there holds*

$$E_3 \leq \frac{\lambda d}{2\eta\sqrt{n}}.$$

**Proof.** From the definitions of  $f_{\mathbf{z}}$  and  $\bar{f}_{\mathbf{z}}$  in Section 2, we know that

$$\mathcal{E}_{\mathbf{z}}(f_{\mathbf{z}}) \leq \mathcal{E}_{\mathbf{z}}(f_{\eta}) + \lambda\Omega(f_{\mathbf{z}}) \leq \mathcal{E}_{\mathbf{z}}(\bar{f}_{\mathbf{z}}) + \lambda\Omega(\bar{f}_{\mathbf{z}})$$

and

$$\mathcal{E}_{\mathbf{z}}(\bar{f}_{\mathbf{z}}) + \eta \sum_{j=1}^d \tau_j \|\bar{f}_{\mathbf{z}}^{(j)}\|_{K^{(j)}}^2 \leq \mathcal{E}_{\mathbf{z}}(f_{\eta}) + \eta \sum_{j=1}^d \tau_j \|f_{\eta}^{(j)}\|_{K^{(j)}}^2.$$

Then,

$$\begin{aligned}E_3 &= \mathcal{E}_{\mathbf{z}}(f_{\mathbf{z}}) + \lambda\Omega(f_{\mathbf{z}}) - \left( \mathcal{E}_{\mathbf{z}}(f_{\eta}) + \eta \sum_{j=1}^d \tau_j \|f_{\eta}^{(j)}\|_{K^{(j)}}^2 \right) \\ &\leq \mathcal{E}_{\mathbf{z}}(\bar{f}_{\mathbf{z}}) + \lambda\Omega(\bar{f}_{\mathbf{z}}) - \left( \mathcal{E}_{\mathbf{z}}(f_{\eta}) + \eta \sum_{j=1}^d \tau_j \|f_{\eta}^{(j)}\|_{K^{(j)}}^2 \right) \\ &\leq \mathcal{E}_{\mathbf{z}}(\bar{f}_{\mathbf{z}}) + \eta \sum_{j=1}^d \tau_j \|\bar{f}_{\mathbf{z}}^{(j)}\|_{K^{(j)}}^2 - \left( \mathcal{E}_{\mathbf{z}}(f_{\eta}) + \eta \sum_{j=1}^d \tau_j \|f_{\eta}^{(j)}\|_{K^{(j)}}^2 \right) + \lambda\Omega(\bar{f}_{\mathbf{z}}) \\ &\leq \lambda\Omega(\bar{f}_{\mathbf{z}}).\end{aligned} \quad (6)$$

According to  $\bar{f}_{\mathbf{z}}$  in (4) and (5), we have

$$\lambda\Omega(\bar{f}_{\mathbf{z}}) = \lambda \sum_{j=1}^d \tau_j \sqrt{\sum_{i=1}^n (\mu_i \tau_j^{-1})^2} = \lambda \sum_{j=1}^d \tau_j \sqrt{\sum_{i=1}^n \mu_i^2} \leq \frac{\lambda d}{2\eta\sqrt{n}}. \quad (7)$$

Combining (6) and (7), we derive the desired estimate.  $\square$

## 1.2 Sample error estimate

The error term  $E_1$  in (1) reflects the divergence between the expected excess risk  $\mathcal{E}(\pi(f_{\mathbf{z}})) - \mathcal{E}(f_c)$  and the empirical excess risk  $\mathcal{E}_{\mathbf{z}}(\pi(f_{\mathbf{z}})) - \mathcal{E}_{\mathbf{z}}(f_c)$ . Since  $f_{\mathbf{z}}$  involves any given  $\mathbf{z} = \{(x_i, y_i)\}_{i=1}^n$ , we introduce the concentration inequality in [5] to bound  $E_1$ .

**Lemma 1** *Let  $\mathcal{G}$  be a set of measurable functions on  $\mathcal{Z}$  and  $B, c > 0, \tau \in [0, 1]$  be constants such that  $\|g\|_{\infty} \leq B, Eg^2 \leq c(Eg)^{\tau}$  for all  $g \in \mathcal{G}$ . Assume that  $\log \mathcal{N}_2(\mathcal{G}, \varepsilon) \leq a\varepsilon^{-s}, \forall \varepsilon > 0$  for some  $a > 0$  and  $s \in (0, 2)$ . Then, there exists a constant  $c'_s$  such that for any  $\delta \in (0, 1)$*

$$Eg - \frac{1}{n} \sum_{i=1}^n g(z_i) \leq \frac{1}{2} \zeta^{1-\tau} (Eg)^{\tau} + c'_s \zeta + 2 \left( \frac{c \log(1/\delta)}{n} \right)^{\frac{1}{2-\tau}} + \frac{18B \log(1/\delta)}{n}$$

with confidence  $1 - \delta$ , where

$$\zeta = \max \left\{ c^{\frac{2-s}{4-2\tau+s\tau}} \left( \frac{a}{n} \right)^{\frac{2}{4-2\tau+s\tau}}, B^{\frac{2-s}{2+s}} \left( \frac{a}{n} \right)^{\frac{2}{2+s}} \right\}.$$

The following lemma demonstrates the upper bound of  $f_{\mathbf{z}}$  for any  $\mathbf{z} \in \mathcal{Z}^n$ .

**Lemma 2** *For  $f_{\mathbf{z}}$  defined in Section 2, there holds*

$$\|f_{\mathbf{z}}^{(j)}\|_{K^{(j)}} \leq \|f_{\mathbf{z}}\|_K \leq \frac{\kappa \sqrt{n}}{\lambda \min_j \tau_j}, \forall j \in \{1, \dots, d\}.$$

**proof.** The definition  $f_{\mathbf{z}}$  tells us that

$$\Omega(f_{\mathbf{z}}) = \sum_{j=1}^d \tau_j \sqrt{\sum_{i=1}^n (\alpha_{\mathbf{z},i}^{(j)})^2} \leq \frac{1}{\lambda}.$$

This means

$$\sum_{j=1}^d \sqrt{\sum_{i=1}^n (\alpha_{\mathbf{z},i}^{(j)})^2} \leq \frac{1}{\lambda \min_j \tau_j}. \quad (8)$$

Meanwhile, we deduce that

$$\|f_{\mathbf{z}}\|_K \leq \sum_{j=1}^d \|f_{\mathbf{z}}^{(j)}\|_{K^{(j)}} \leq \kappa \sum_{j=1}^d \sum_{i=1}^n |\alpha_{\mathbf{z},i}^{(j)}| \leq \kappa \sqrt{n} \sum_{j=1}^d \sqrt{\sum_{i=1}^n (\alpha_{\mathbf{z},i}^{(j)})^2}, \quad (9)$$

where the last inequality follows from Höder inequality.

The desired upper bound follows by combining (8) and (9).  $\square$

**Proposition 3** *Under Assumptions A and B, for any  $\delta \in (0, 1)$ , there holds*

$$\begin{aligned} E_1 &\leq C_1 \max \left\{ \lambda^{\frac{-2s(q+1)}{4+2q+s q}} n^{-\frac{(2-s)(q+1)}{4+2q+s q}}, \lambda^{-\frac{2s}{2+s}} n^{-\frac{2-s}{2+s}} \right\}^{\frac{1}{1+q}} \left( \mathcal{E}(\pi(f_{\mathbf{z}})) - \mathcal{E}(f_c) \right)^{\frac{q}{1+q}} \\ &\quad + C_2 \max \left\{ \lambda^{\frac{-2s(q+1)}{4+2q+s q}} n^{-\frac{(2-s)(q+1)}{4+2q+s q}}, \lambda^{-\frac{2s}{2+s}} n^{-\frac{2-s}{2+s}} \right\} + \frac{36 \log(1/\delta)}{n} \\ &\quad + \left( 8(2\Delta)^{-\frac{q}{q+1}} \log(1/\delta) \right)^{\frac{q+1}{q+2}} n^{-\frac{q+1}{q+2}} \end{aligned}$$

with confidence  $1 - \delta$ , where  $C_1, C_2$  are positive constants independent of  $n$ .

**Proof.** Recall that

$$E_1 = \int [(1 - y\pi(f_{\mathbf{z}})(x))_+ - (1 - yf_c(x))_+] d\rho - \frac{1}{n} \sum_{i=1}^n [(1 - y_i\pi(f_{\mathbf{z}})(x_i))_+ - (1 - y_i f_c(x_i))_+]$$

and  $f_{\mathbf{z}} \in \mathcal{B}_r$  with  $r = \frac{\kappa\sqrt{n}}{\lambda \min_j \tau_j}$ . We consider the function set

$$\mathcal{G} = \left\{ g(z) = (1 - y\pi(f)(x))_+ - (1 - yf_c(x))_+ : f \in \mathcal{B}_r, (x, y) \in \mathcal{Z} \right\}.$$

Since for any  $f_1, f_2 \in \mathcal{B}_r$

$$|(1 - y\pi(f_1)(x))_+ - (1 - y\pi(f_2)(x))_+| \leq |y\pi(f_1)(x) - y\pi(f_2)(x)| \leq |f_1(x) - f_2(x)|,$$

we have

$$\log \mathcal{N}_2(\mathcal{G}, \varepsilon) \leq \log \mathcal{N}_2(\mathcal{B}_r, \varepsilon) \leq \log \mathcal{N}_2(\mathcal{B}_1, \varepsilon r^{-1}) \leq c_s d^{1+s} r^s \varepsilon^{-s},$$

where the last inequality follows from Assumption B.

Considering  $0 \leq (1 - y\pi(f)(x))_+ \leq 2$  and  $0 \leq (1 - yf_c(x))_+ \leq 2$ , we get that  $\|g\|_\infty \leq 2$  for every  $g \in \mathcal{G}$ . Under Assumption A, there holds

$$Eg^2 \leq 8(2\Delta)^{-\frac{q}{q+1}} (Eg)^{\frac{q}{1+q}}.$$

Hence, we can apply Lemma 1 to get the concentration estimate for any  $g \in \mathcal{G}$ , where the parameters  $a = c_s d^{1+s} r^s$ ,  $B = 2$ ,  $c = 8(2\Delta)^{-\frac{q}{q+1}}$ , and  $\tau = \frac{q}{q+1}$ . Note that  $f_{\mathbf{z}} \in \mathcal{B}_r$  with  $r = \frac{\kappa\sqrt{n}}{\lambda \min_j \tau_j}$ . We deduce that

$$E_1 \leq \frac{1}{2} \zeta^{\frac{1}{q+1}} \left( \mathcal{E}(\pi(f_{\mathbf{z}})) - \mathcal{E}(f_c) \right)^{\frac{q}{1+q}} + \frac{36 \log(1/\delta)}{n} + c'_s \zeta + \left( \frac{8(2\Delta)^{-\frac{q}{q+1}} \log(1/\delta)}{n} \right)^{\frac{q+1}{q+2}},$$

with confidence  $1 - \delta$ , where

$$\begin{aligned} \zeta &= \max \left\{ 2^{\frac{(2-s)(1+q)}{4+2q+sq}} (c_s \kappa^s d^{s+s^2} (\min \tau_j)^{-s})^{\frac{2q+2}{4+2q+sq}} \lambda^{\frac{-2s(q+1)}{4+2q+sq}} n^{-\frac{(2-s)(q+1)}{4+2q+sq}}, \right. \\ &\quad \left. 2^{\frac{2-s}{2+s}} c_s^{\frac{2}{2+s}} d^{\frac{2+2s}{2+s}} (\kappa)^{\frac{2s}{2+s}} (\lambda \min \tau_j)^{-\frac{2s}{2+s}} n^{-\frac{2-s}{2+s}} \right\}. \end{aligned}$$

This completes the proof.  $\square$

Now we turn to bound the error term  $E_2$  in terms of the following one-side Bernstein inequality [1, 3, 4].

**Lemma 3** *Let  $\xi$  be a random variable on a probability space  $\mathcal{Z}$  satisfying  $|\xi(z) - E\xi| \leq M_\xi$  for some constant  $M_\xi$  and  $\sigma$  is its variance. Then, for any  $\delta \in (0, 1)$ , with confidence  $1 - \delta$  there holds*

$$\frac{1}{n} \sum_{i=1}^n \xi(z_i) - E\xi \leq \frac{2M_\xi \log(1/\delta)}{3n} + \sqrt{\frac{2\sigma^2 \log(1/\delta)}{n}}.$$

**Proposition 4** *Under Assumption A, for any  $\delta \in (0, 1)$ , we have*

$$E_2 \leq \frac{5\kappa \log(1/\delta)}{3n} \sqrt{\frac{D(\eta)}{\eta \min_j \tau_j}} + \frac{4 \log(1/\delta)}{3n} + \frac{q+2}{2q+2} \left( \frac{16(2\Delta)^{-\frac{q}{q+1}} \log(1/\delta)}{n} \right)^{\frac{q+1}{q+2}} + D(\eta)$$

with confidence  $1 - 2\delta$ .

**Proof.** To bound  $E_2$ , we introduce

$$\xi(z) = (1 - yf_\eta(x))_+ - (1 - yf_c(x))_+, z = (x, y) \in \mathcal{Z}.$$

It is easy to verify that

$$E_2 = \frac{1}{n} \sum_{i=1}^n \xi(z_i) - E\xi = \left\{ \frac{1}{n} \sum_{i=1}^n \xi_1(z_i) - E\xi_1 \right\} + \left\{ \frac{1}{n} \sum_{i=1}^n \xi_2(z_i) - E\xi_2 \right\}, \quad (10)$$

where

$$\xi_1(z) = (1 - yf_\eta(x))_+ - (1 - y\pi(f_\eta)(x))_+$$

and

$$\xi_2(z) = (1 - y\pi(f_\eta)(x))_+ - (1 - yf_c(x))_+.$$

The definition  $f_\eta$  in Section 3 tells us that

$$\|f_\eta\|_\infty \leq \kappa \|f_\eta\|_K \leq \kappa \sqrt{\frac{D(\eta)}{\eta \min_j \tau_j}}.$$

Then, for any  $z \in \mathcal{Z}$ ,

$$0 \leq \xi_1(z) \leq |f_\eta(x) - \pi(f_\eta)(x)| \leq \kappa \sqrt{\frac{D(\eta)}{\eta \min_j \tau_j}},$$

$$|\xi_1 - E\xi_1| \leq \kappa \sqrt{\frac{D(\eta)}{\eta \min_j \tau_j}}, \text{ and } \sigma^2(\xi_1) \leq \kappa \sqrt{\frac{D(\eta)}{\eta \min_j \tau_j}} E\xi_1.$$

Applying Lemma 3 to  $\xi_1$ , we obtain with confidence  $1 - \delta$

$$\begin{aligned} \frac{1}{n} \sum_{i=1}^n \xi_1(z_i) - E\xi_1 &\leq \frac{2\kappa \log(1/\delta)}{3n} \sqrt{\frac{D(\eta)}{\eta \min_j \tau_j}} + \sqrt{\frac{2\kappa E\xi_1 \log(1/\delta)}{n}} \sqrt{\frac{D(\eta)}{\eta \min_j \tau_j}} \\ &\leq \frac{5\kappa \log(1/\delta)}{3n} \sqrt{\frac{D(\eta)}{\eta \min_j \tau_j}} + E\xi_1. \end{aligned} \quad (11)$$

Now we turn to consider the concentration estimate of  $\xi_2$ . Note that  $0 \leq \xi_2(z) \leq 2$  for any  $z \in \mathcal{Z}$ . Applying Lemma 3 to  $\xi_2$ , we get with confidence  $1 - \delta$

$$\begin{aligned} \frac{1}{n} \sum_{i=1}^n \xi_2(z_i) - E\xi_2 &\leq \frac{4 \log(1/\delta)}{3n} + \sqrt{\frac{2E\xi_2^2 \log(1/\delta)}{n}} \\ &\leq \frac{4 \log(1/\delta)}{3n} + \sqrt{\frac{16(2\Delta)^{-\frac{q}{q+1}} \log(1/\delta)}{n}} (E\xi_2)^{\frac{q}{2q+2}}, \end{aligned} \quad (12)$$

where the last inequality follows from Assumption A.

Recall that

$$\frac{1}{t} + \frac{1}{t'} = 1 \text{ with } t, t' > 0 \Rightarrow a \cdot b \leq \frac{a^t}{t} + \frac{b^{t'}}{t'}, \forall a, b \geq 0.$$

Applying this elementary inequality to  $a = \sqrt{\frac{16(2\Delta)^{-\frac{q}{q+1}} \log(1/\delta)}{n}}$ ,  $b = (E\xi_2)^{\frac{q}{2q+2}}$ ,  $t = \frac{2q+2}{q}$ ,  $t' = \frac{2q+2}{q}$ , we further get

$$\sqrt{\frac{16(2\Delta)^{-\frac{q}{q+1}} \log(1/\delta)}{n}} (E\xi_2)^{\frac{q}{2q+2}} \leq \frac{q+2}{2q+2} \left( \frac{16(2\Delta)^{-\frac{q}{q+1}} \log(1/\delta)}{n} \right)^{\frac{q+1}{q+2}} + \frac{q}{2q+2} E\xi_2.$$

This together with (12) means

$$\frac{1}{n} \sum_{i=1}^n \xi_2(z_i) - E\xi_2 \leq \frac{4 \log(1/\delta)}{3n} + \frac{q+2}{2q+2} \left( \frac{16(2\Delta)^{-\frac{q}{q+1}} \log(1/\delta)}{n} \right)^{\frac{q+1}{q+2}} + \frac{q}{2q+2} E\xi_2. \quad (13)$$

Combining (10), (11) and (13), we obtain, with confidence  $1 - 2\delta$ ,

$$E_2 \leq \frac{5\kappa \log(1/\delta)}{3n} \sqrt{\frac{D(\eta)}{\eta \min_j \tau_j}} + \frac{4 \log(1/\delta)}{3n} + \frac{q+2}{2q+2} \left( \frac{16(2\Delta)^{-\frac{q}{q+1}} \log(1/\delta)}{n} \right)^{\frac{q+1}{q+2}} + E\xi.$$

The desired result follows by considering  $E\xi \leq D(\eta)$ .  $\square$

### 1.3 Proof of Theorem 1

**Proof.** Combining Propositions 1-4, we get with confidence  $1 - 3\delta$

$$\begin{aligned}
& \mathcal{E}(\pi(f_{\mathbf{z}})) - \mathcal{E}(f_c) \\
\leq & C_1 \max \left\{ \lambda^{\frac{-2s(q+1)}{4+2q+sq}} n^{-\frac{(2-s)(q+1)}{4+2q+sq}}, \lambda^{-\frac{2s}{2+s}} n^{-\frac{2-s}{2+s}} \right\}^{\frac{1}{1+q}} \left( \mathcal{E}(\pi(f_{\mathbf{z}})) - \mathcal{E}(f_c) \right)^{\frac{q}{1+q}} \\
& + C_2 \max \left\{ \lambda^{\frac{-2s(q+1)}{4+2q+sq}} n^{-\frac{(2-s)(q+1)}{4+2q+sq}}, \lambda^{-\frac{2s}{2+s}} n^{-\frac{2-s}{2+s}} \right\} + \left( \frac{24(2\Delta)^{-\frac{q}{q+1}} \log(1/\delta)}{n} \right)^{\frac{q+1}{q+2}} \\
& + \frac{112 \log(1/\delta)}{n} + \frac{5\kappa \log(1/\delta)}{3n} \sqrt{\frac{D(\eta)}{\eta \min_j \tau_j}} + \frac{q+2}{2q+2} \left( \frac{16(2\Delta)^{-\frac{q}{q+1}} \log(1/\delta)}{n} \right)^{\frac{q+1}{q+2}} \\
& + 2D(\eta) + \frac{d\lambda}{2\eta\sqrt{n}}.
\end{aligned}$$

Recall that, for  $a, b > 0$  and  $t \in (0, 1)$ ,

$$x \leq ax^t + b, x > 0 \Rightarrow x \leq \max\{(2a)^{\frac{1}{1-t}}, 2b\}.$$

We apply the above elementary inequality to  $x = \mathcal{E}(\pi(f_{\mathbf{z}})) - \mathcal{E}(f_c)$  and  $t = \frac{q}{q+1}$ . Then, under Assumption C, we further get

$$\begin{aligned}
\mathcal{E}(\pi(f_{\mathbf{z}})) - \mathcal{E}(f_c) \leq & C \log(3/\delta) \left( \max \left\{ \lambda^{\frac{-2s(q+1)}{4+2q+sq}} n^{-\frac{(2-s)(q+1)}{4+2q+sq}}, \lambda^{-\frac{2s}{2+s}} n^{-\frac{2-s}{2+s}} \right\} \right. \\
& \left. + n^{-\frac{q+1}{q+2}} + \eta^{\frac{\beta-1}{2}} n^{-1} + \eta^\beta + \lambda \eta^{-1} n^{-\frac{1}{2}} \right) \quad (14)
\end{aligned}$$

with confidence  $1 - \delta$ .

Setting  $\eta^\beta = \lambda \eta^{-1} n^{-\frac{1}{2}}$ , we have  $\eta = \lambda^{\frac{1}{\beta+1}} n^{-\frac{1}{2\beta+2}}$ . Then, (14) yields with confidence  $1 - \delta$

$$\begin{aligned}
& \mathcal{E}(\pi(f_{\mathbf{z}})) - \mathcal{E}(f_c) \\
\leq & C \log(3/\delta) \left( \lambda^{\frac{-2s(q+1)}{4+2q+sq}} n^{-\frac{(2-s)(q+1)}{4+2q+sq}} + n^{-\frac{q+1}{q+2}} + \lambda^{\frac{\beta-1}{2\beta+2}} n^{-\frac{3+5\beta}{4+4\beta}} + \lambda^{\frac{\beta}{\beta+1}} n^{-\frac{\beta}{2\beta+2}} \right), \quad (15)
\end{aligned}$$

where  $C$  is a positive constant independent of  $n, \delta$ .

The desired result follows by taking  $\lambda = n^{-\theta}$  with  $\theta \in (0, \min\{\frac{2-s}{2s}, \frac{3+5\beta}{2-2\beta}\})$  in (15) and considering

$$\mathcal{R}(\text{sgn}(f_{\mathbf{z}})) - \mathcal{R}(f_c) \leq \mathcal{E}(\pi(f_{\mathbf{z}})) - \mathcal{E}(f_c).$$

## References

- [1] S. N. Bernstein. *The Theory of Probabilities*. Gastehizdat Publishing House, Moscow, 1946.
- [2] H. Chen, Z. Pan, L. Li, and Y. Tang. Learning rates of coefficient-based regularized classifier for density level detection. *Neural Comput.*, 25(4):1107–1121, 2013.
- [3] F. Cucker and D. X. Zhou. *Learning Theory: An Approximation Theory Viewpoint*. Cambridge Univ. Press, Cambridge, U.K., 2007.
- [4] I. Steinwart and A. Christmann. *Support Vector Machines*. Springer, 2008.
- [5] Q. Wu, Y. Ying, and D. X. Zhou. Multi-kernel regularized classifiers. *J. Complexity*, 23:108–134, 2007.
- [6] Q. Wu and D. X. Zhou. Svm soft margin classifiers: linear programming versus quadratic programming. *Neural Comput.*, 17:1160–1187, 2005.
